# Supplementary material
Source: Springer Nature journal article supplement (https://www.springermedizin.de/resource/supplementary/12887_2014_1093_MOESM3_ESM.pdf/9476510)
Supplement: MOESM3 [file 9476510]

Identification

Records identified via PubMed and CINAHL search (N = 7,490)

Additional records identified via review of reference lists (n = 1)

Records after duplicates removed (n = 7,009)

Screening

Titles and abstracts scanned (n = 7,009)

Records excluded (n=6,738)

Eligibility

Full-text articles assessed for eligibility (n = 271)

Full-text articles excluded from femur fracture review (n = 247):

Not relevant to study question (n = 101)

Age > 5years (n = 78)

Study type/design (n = 22)

Post-mortem study (n = 1)

Unable to locate manuscript (n=2)

< 10 eligible subjects (n = 4)

Duplicate study sample (n=1)

Other fracture type (non-femur) (n = 38)

Studies included in qualitative synthesis (n = 24)

Included

Studies included in quantitative synthesis (n = 24)
